# Supplementary material for: Chemically specific sampling bias: the ratio of PM2.5 to surface AOD on average and peak days in the U.S.
Source: Royal Society of Chemistry journal article supplement (doi:10.1039/d3ea00163f), 2024-01-01
Supplement: d3ea00163f1.pdf [file d3ea00163f1.pdf]

Supporting Information for:

**Chemically specific sampling bias: the ratio of PM<sub>2.5</sub> to surface AOD on average and peak days in the U.S.**

Simon Rosanka, Madison M. Flesch, Yinting T. Chiu, and Annmarie G. Carlton\*

University of California, Irvine Department of Chemistry, Irvine, CA

Corresponding author: Annmarie G. Carlton, [agcarlto@uci.edu](mailto:agcarlto@uci.edu)

**Contents:**

1. Text S1
2. Movie S1 (file uploaded separately)
3. Figures S1 to S7
4. Table S1 to S3

**Introduction**

This document includes information about the monitors used for the decadal and hourly analysis, methodology figures relating to aerosol liquid water,  $f(\text{RH})$ , and nitrate adjustment calculations, decadal planetary boundary layer height, sulfate, and  $f(\text{RH})$  trends, comparison of reported and adjusted PM<sub>2.5</sub> mass concentrations, and differences in hourly model and observational median  $\eta$  values.

## Text S1

From Equation 1, we estimate  $f(RH)$  using mass concentrations of reported dry  $PM_{2.5}$ ,  $PM_{2.5}$  chemical constituents, estimates of ALW, and aerosol density:

$$f(RH) = \frac{\left(\frac{[ALW]}{\rho_w}\right)^{1/3} + \left(\frac{m_{d,dry}}{\rho_d}\right)^{1/3}}{\left(\frac{m_{d,spec}}{\rho_d}\right)^{1/3}}$$

Here,  $[ALW]$  is the mass concentration of ALW ( $\mu\text{g m}^{-3}$ ),  $\rho_w$  is the density of water ( $1 \text{ g mL}^{-1}$ ),  $m_{d,dry}$  is the monitor-reported  $PM_{2.5}$  mass ( $\mu\text{g m}^{-3}$ ),  $m_{d,spec}$  is the summed mass of the reported chemical constituents (sulfate, nitrate, OM, sodium, chloride, calcium, potassium, and magnesium;  $\mu\text{g m}^{-3}$ ), and  $\rho_d$  is the density of dry aerosol as a mass-weighted average dependent on measured aerosol composition ( $\text{g cm}^{-3}$ ). Note that  $f(RH)$  is typically measured at arbitrary "humid" and "dry" values, and in this work, we estimate particle diameters accounting for particle composition and ambient RH. Reported  $PM_{2.5}$  mass concentrations average  $5.3 \mu\text{g m}^{-3}$  greater than the speciated sum  $PM_{2.5}$  totals. This is primarily due to missing chemical species measurements at some sites and limiting the calculation of the summed speciation mass to only the species used to determine dry aerosol density for consistency.

**Movie S1.** Movie of annual Pearson ( $\rho_p$ ) correlations for regime-aggregated aerosol optical depth (AOD),  $PM_{2.5}$ , nitrate, and sulfate mass concentrations, and planetary boundary layer (PBL) height for the humid (left) and arid (right) regimes from 2006 to 2015. Red and positive numbers indicate strong correlation, blue and negative numbers a strong anticorrelation, and gray indicates little to no correlation between two variables.

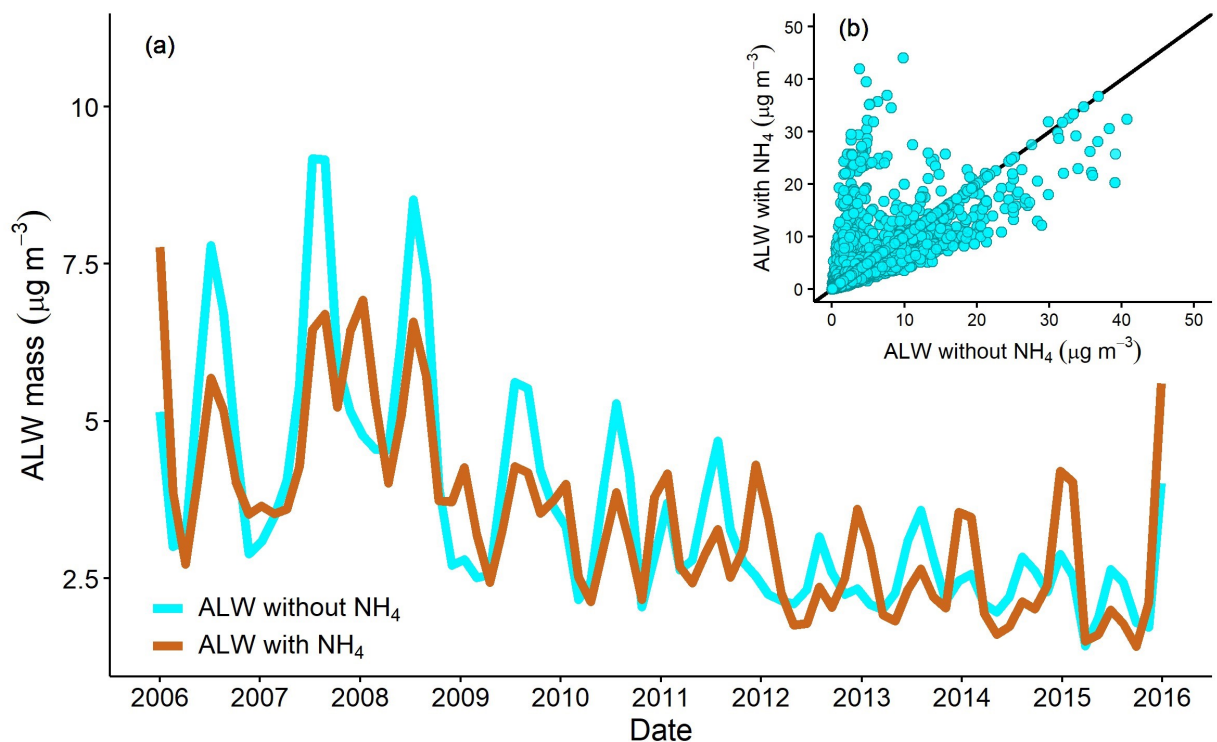

**Figure S1.** Sensitivity study of aerosol liquid water (ALW) with and without ammonium ( $\text{NH}_4$ ) included in estimations via ISORROPIAv2.1 at 8 AERONET stations studied from 2006 to 2015 as a function of time (main figure) and against each other (inset). In the time series, the light blue fit excludes ammonium, and the brown fit includes ammonium. The black line in the inset represents the 1:1 line.

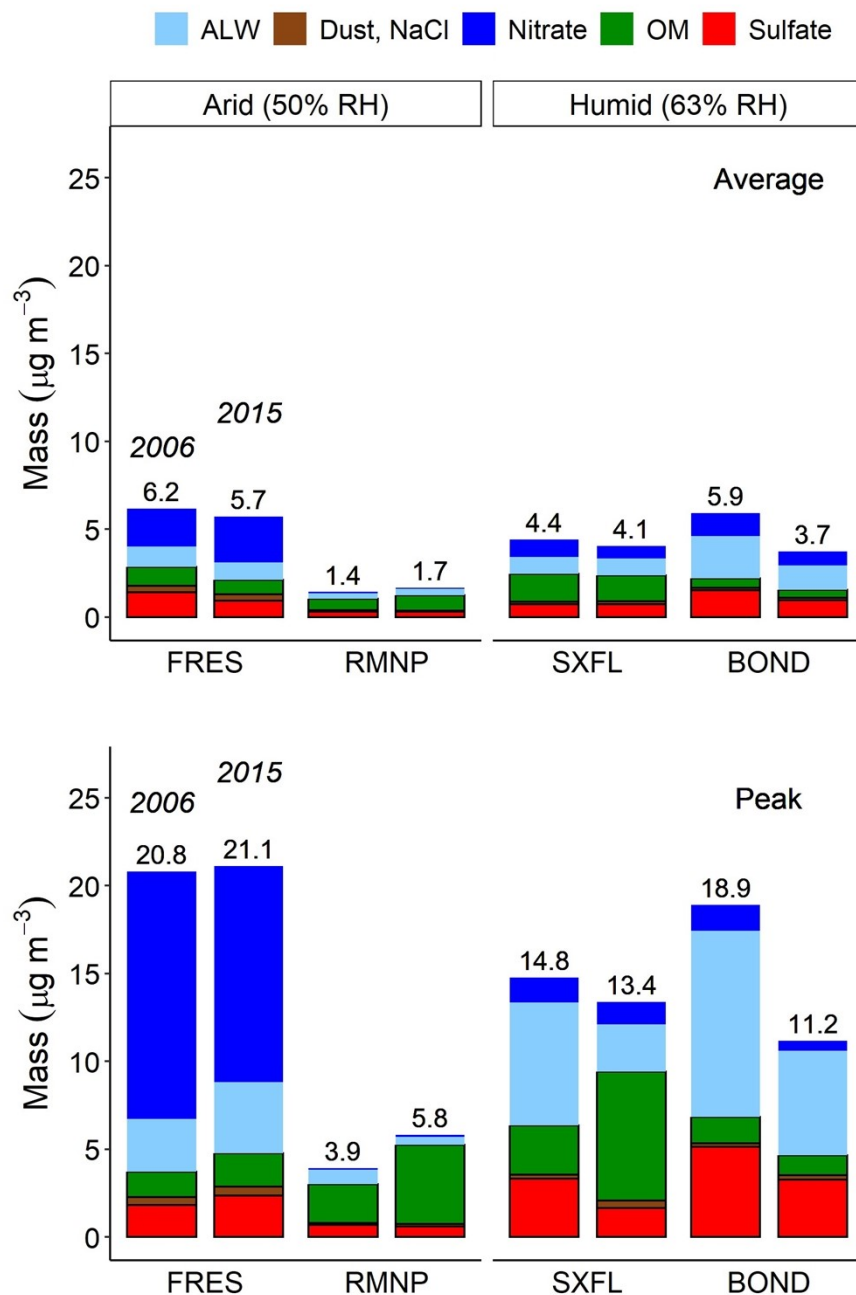

**Figure S2.**  $\text{PM}_{2.5}$  chemical composition consisting of non-volatile species (sulfate, dust (calcium, magnesium, potassium), NaCl, and organic matter (OM)) and semi-volatile species (nitrate, aerosol liquid water (ALW)) on average (top) and peak (bottom, where AOD and  $\text{PM}_{2.5}$  are both above their locally determined 75<sup>th</sup> percentile) days for the 4 stations with consistent organic species measurements in both 2006 (left bars) and 2015 (right bars).

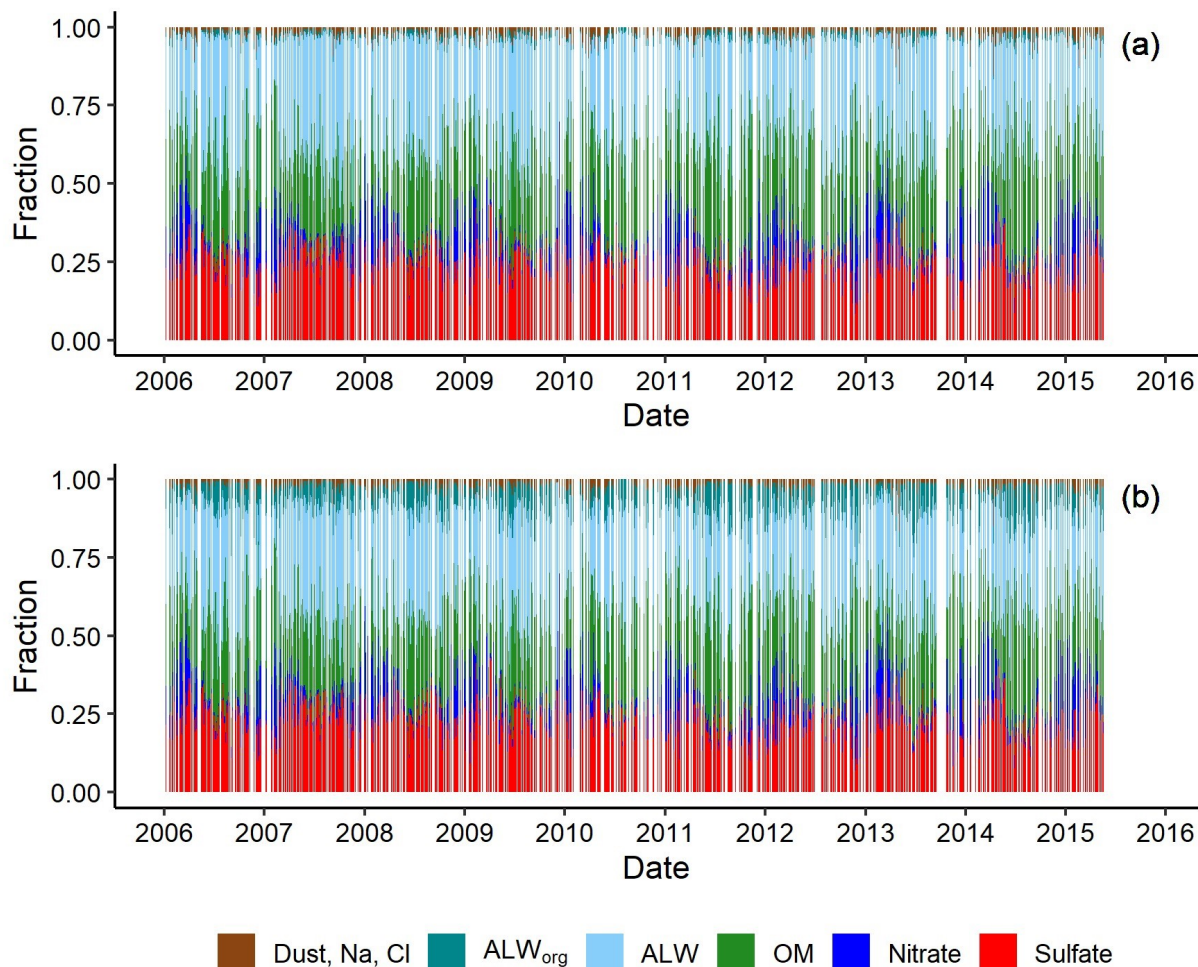

**Figure S3.** Sensitivity study of the fractional contribution of organic aerosol liquid water (ALW<sub>org</sub>, teal) to PM<sub>2.5</sub> mass concentrations using hygroscopicity parameters of (a)  $\kappa = 0.3$  and (b)  $\kappa = 0.05$  at the GSFC monitoring location with IMPROVE PM<sub>2.5</sub> chemical composition from 2006 to 2015. Dust species include calcium, potassium, and magnesium.

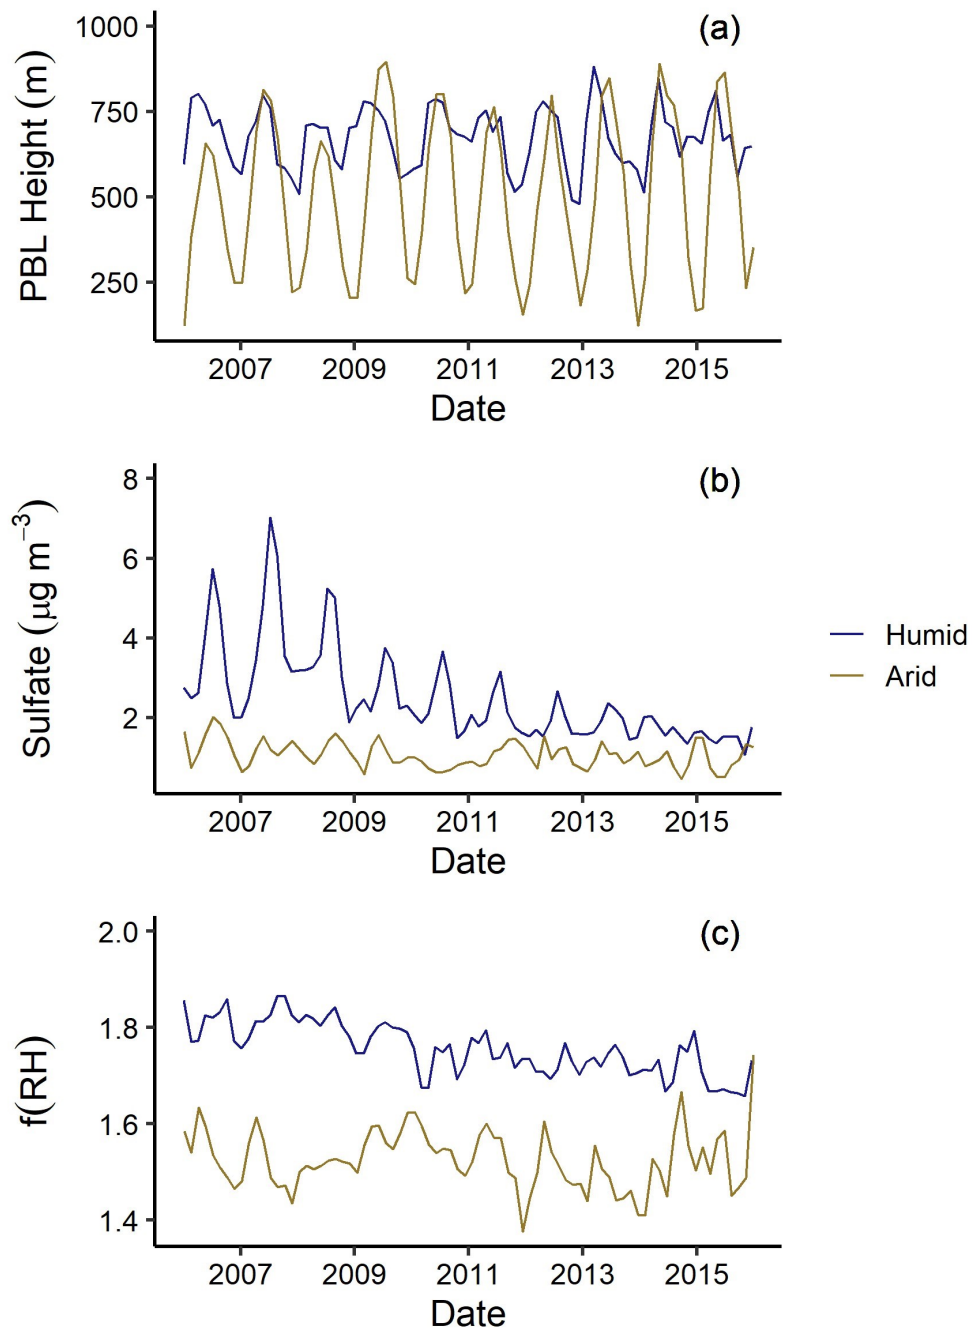

**Figure S4.** Time series of (a) planetary boundary layer (PBL) height, (b) sulfate mass concentrations, and (c)  $f(\text{RH})$  for 8 AERONET locations in the humid (dark blue) and arid (dark gold) regions from 2006 to 2015.

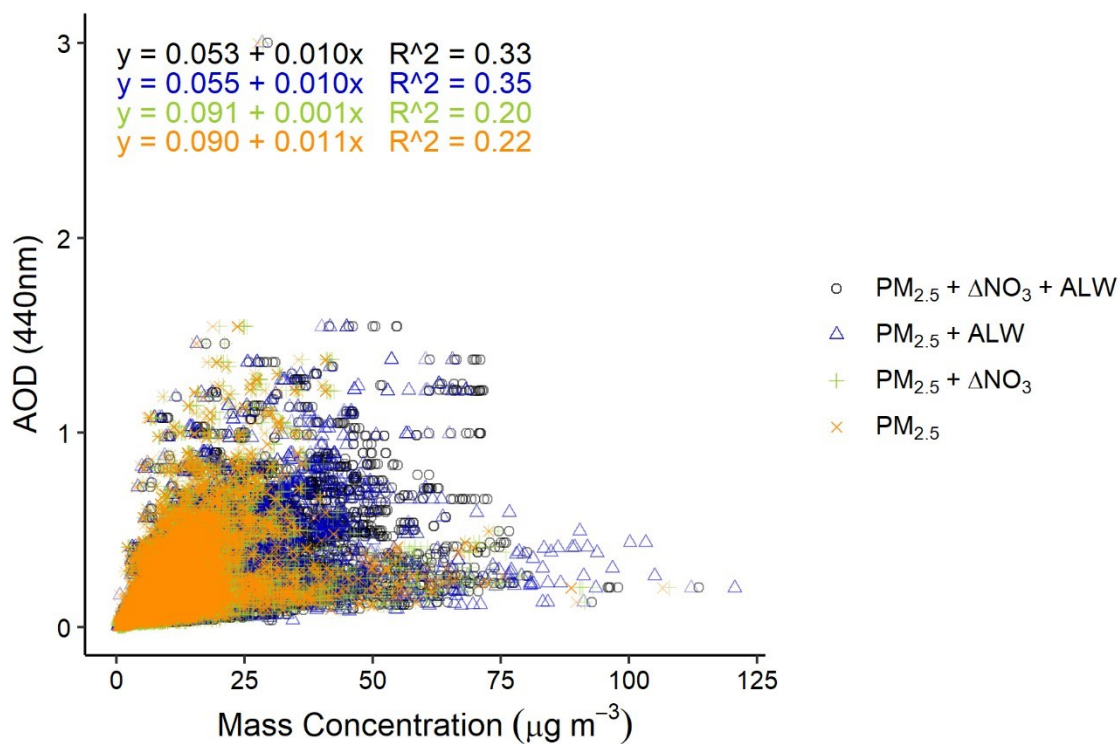

**Figure S5.** Comparison of various combinations of PM<sub>2.5</sub>, aerosol liquid water (ALW), and nitrate (NO<sub>3</sub>) correction mass concentrations against aerosol optical depth (AOD) at 440 nm with their respective equations of best fit and R<sup>2</sup> values.

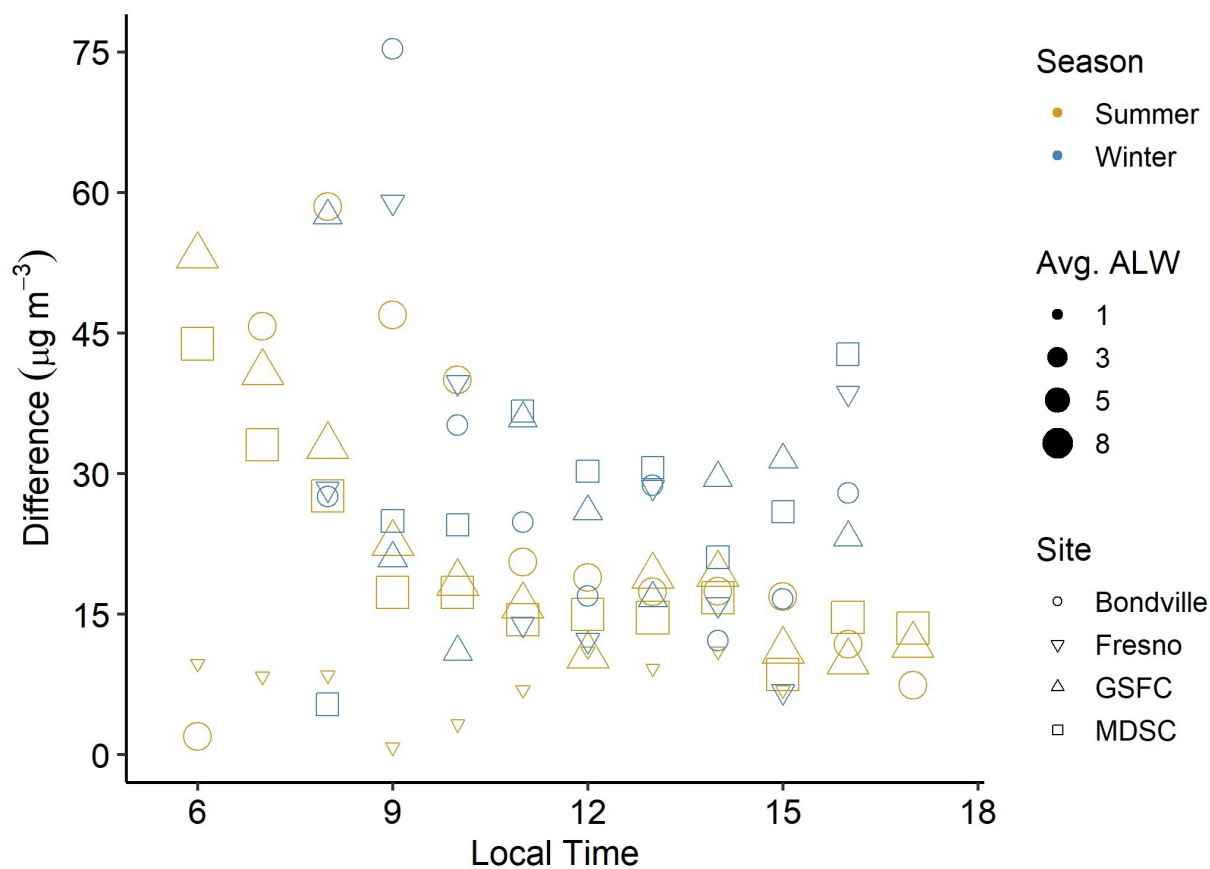

**Figure S6.** Differences in hourly CMAQ-simulated and surface observation median  $\eta$  values for the Bondville, Fresno, GSFC, and MDSC sites (point shape) in winter (blue) and summer (tan), grouped by each site's average winter and summer aerosol liquid water (ALW,  $\mu\text{g m}^{-3}$ ; point size), respectively.



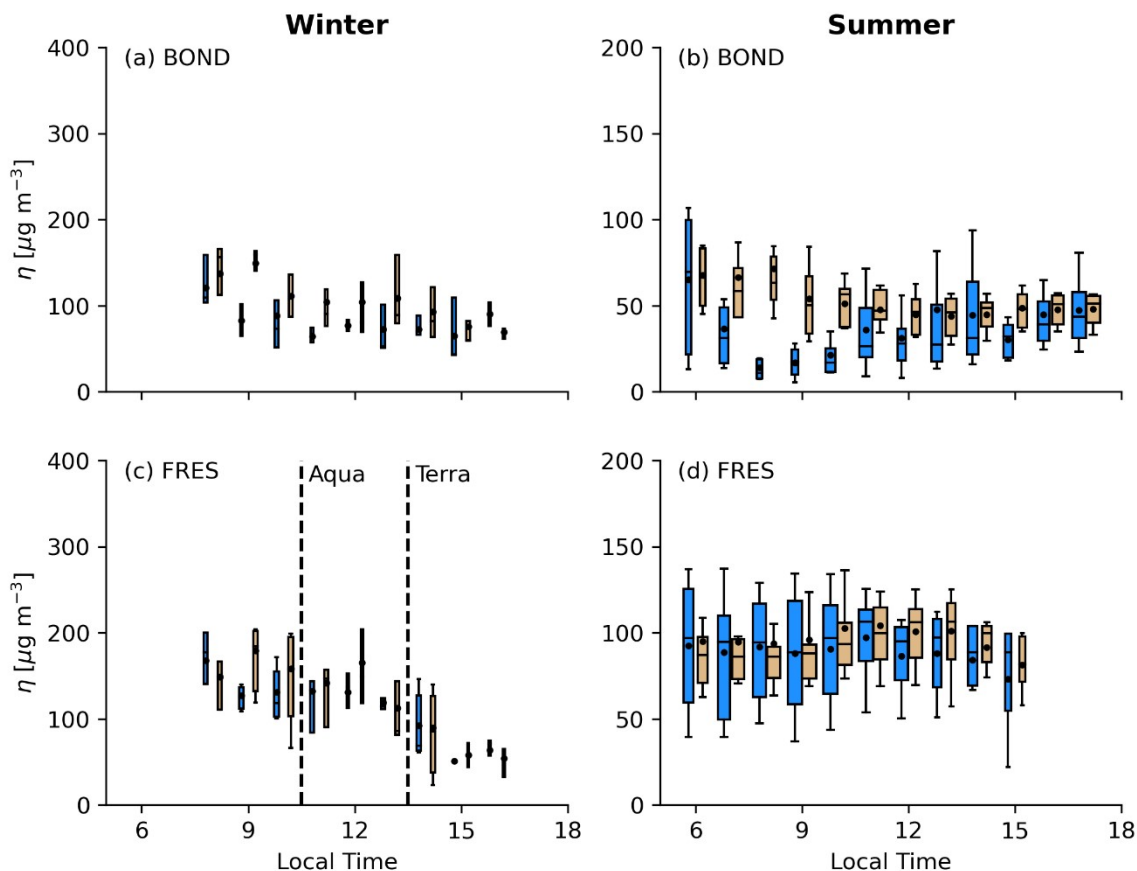

**Figure S7.** Diurnal distributions of eta ( $\eta$ ) for January 2016 (“Winter” column) and August 2015 (“Summer” column) of surface-based hourly PM<sub>2.5</sub> mass concentrations and AERONET AOD at 440 nm (blue boxes, points) and CMAQ model predictions using AOD at 550 nm (brown boxes, points) for BOND (a,b) and FRES (c,d). Points indicate the mean. Boxes represent the 25th to 75th percentile with the center horizontal line as the median and whiskers as the 10th and 90th percentile. The box width is proportional to the number of data pairs in each individual comparison set relative to the entire data set. Note the winter and summer y-axis scales differ. Vertical dashed lines in (c) indicate nominal overpass times for MODIS onboard the Aqua (10:30 a.m.) and Terra (1:30 p.m.) satellites.

**Table S1.** Site information for all AERONET, IMPROVE, EPA CSN, and ambient PM<sub>2.5</sub> mass concentration monitoring stations used in this study. PM<sub>2.5</sub> mass monitors include SLAMS (State or Local Air Monitoring Stations), SPM (Special Purpose Monitors), and Tribal monitors. Note that not all SLAMS or SPM stations may have associated site names.

| Site Name/Code      | Monitoring Network | Latitude | Longitude |
|---------------------|--------------------|----------|-----------|
| Appalachian_State   | AERONET            | 36.2146  | -81.6938  |
| Billerica           | AERONET            | 42.52835 | -71.2686  |
| BONDVILLE           | AERONET            | 40.05333 | -88.3719  |
| El_Segundo          | AERONET            | 33.9125  | -118.382  |
| Fresno              | AERONET            | 36.78173 | -119.773  |
| Fresno_2            | AERONET            | 36.78537 | -119.773  |
| IMPROVE-MammothCave | AERONET            | 37.1318  | -86.1479  |
| NEON_CVALLA         | AERONET            | 40.16063 | -105.167  |
| NEON_MOAB           | AERONET            | 38.24833 | -109.388  |
| NEON_ORNL           | AERONET            | 35.96413 | -84.2826  |
| NEON_RMNP           | AERONET            | 40.2759  | -105.546  |
| NEON_SCBI           | AERONET            | 38.89292 | -78.1395  |
| Pagosa_Springs      | AERONET            | 37.27028 | -107.05   |
| Red_Mountain_Pass   | AERONET            | 37.90745 | -107.711  |
| Santa_Monica_Colg   | AERONET            | 34.01685 | -118.471  |
| Sevilleta           | AERONET            | 34.35472 | -106.885  |
| Sioux_Falls         | AERONET            | 43.73648 | -96.626   |
| Table_Mountain      | AERONET            | 40.125   | -105.237  |
| Tallahassee         | AERONET            | 30.44583 | -84.2994  |
| Thompson_Farm       | AERONET            | 43.10877 | -70.9483  |
| Tucson              | AERONET            | 32.233   | -110.953  |
| UCSB                | AERONET            | 34.41543 | -119.845  |
| USGS_Flagstaff_ROLO | AERONET            | 35.21484 | -111.634  |
| CCNY                | AERONET            | 42.52835 | -71.2686  |
| Georgia_Tech        | AERONET            | 33.7802  | -84.3995  |
| GSFC                | AERONET            | 38.9925  | -76.8398  |
| MD_Science_Center   | AERONET            | 39.28123 | -76.6121  |
| LIGO1               | IMPROVE            | 35.9723  | -81.9331  |
| LOND1               | IMPROVE            | 42.8624  | -71.3801  |
| BOND1               | IMPROVE            | 40.052   | -88.3733  |
| SAGA1               | IMPROVE            | 34.2969  | -118.028  |
| FRES1               | IMPROVE            | 36.7818  | -119.773  |
| MACA1               | IMPROVE            | 37.1318  | -86.1479  |
| ROMO1               | IMPROVE            | 40.2783  | -105.546  |
| CANY1               | IMPROVE            | 38.4587  | -109.821  |
| GRSM1               | IMPROVE            | 35.6334  | -83.9416  |
| SHEN1               | IMPROVE            | 38.5229  | -78.4348  |
| SHMI1               | IMPROVE            | 37.3038  | -107.484  |

|                                                                     |         |          |            |
|---------------------------------------------------------------------|---------|----------|------------|
| WEMI1                                                               | IMPROVE | 37.6594  | -107.800   |
| BOAP1                                                               | IMPROVE | 33.8695  | -106.852   |
| BLMO1                                                               | IMPROVE | 43.7158  | -96.1913   |
| SAMA1                                                               | IMPROVE | 30.0926  | -84.1614   |
| SAGU1                                                               | IMPROVE | 32.1746  | -110.737   |
| SAWE1                                                               | IMPROVE | 32.2486  | -111.218   |
| RAFA1                                                               | IMPROVE | 34.7339  | -120.007   |
| SYCA1                                                               | IMPROVE | 35.1406  | -111.969   |
| ATLA1                                                               | IMPROVE | 33.6878  | -84.2905   |
| WASH1                                                               | IMPROVE | 39.31083 | -76.4744   |
| Clovis-Villa                                                        | SLAMS   | 36.81945 | -119.71643 |
| HU-Beltsville                                                       | SLAMS   | 39.05528 | -76.87833  |
| Rockville                                                           | SLAMS   | 39.11431 | -77.10688  |
| Oldtown                                                             | SLAMS   | 39.29773 | -76.60460  |
| Madera-City                                                         | SLAMS   | 36.95326 | -120.03420 |
| 3425 N FIRST ST, FRESNO                                             | SLAMS   | 36.78133 | -119.77319 |
| Picayune Rancheria                                                  | TRIBAL  | 37.21360 | -119.69907 |
| MCMILLAN NCore-PAMS                                                 | SLAMS   | 38.92185 | -77.01318  |
| Edgewood                                                            | SLAMS   | 39.41019 | -76.29695  |
| Hanford-Irwin                                                       | SLAMS   | 36.31567 | -119.64345 |
| Fresno – Garland                                                    | SLAMS   | 36.78538 | -119.77321 |
| ISWS CLIMATE STATION                                                | SLAMS   | 40.05278 | -88.37251  |
| Padonia                                                             | SLAMS   | 39.46048 | -76.63354  |
| Visalia-Church                                                      | SLAMS   | 36.33218 | -119.29123 |
| Lee District Park                                                   | SLAMS   | 38.77335 | -77.10468  |
| HAINS POINT PM-2.5 AND IMPROVE<br>SITE ON ROOF OF PARK POLICE BLDG. | SLAMS   | 38.87626 | -77.03406  |
| Essex                                                               | SLAMS   | 39.31083 | -76.47444  |
| DUDLEY SQUARE ROXBURY                                               | SLAMS   | 42.32950 | -71.08260  |
| PEARL ST MUNICIPAL PARKING LOT                                      | SLAMS   | 42.99578 | -71.46253  |
| MOOSEHILL SCHOOL                                                    | SLAMS   | 42.86253 | -71.38014  |
|                                                                     | SPM     | 40.81722 | -74.04376  |
|                                                                     | SLAMS   | 40.81681 | -74.04367  |
|                                                                     | SLAMS   | 40.83311 | -74.04346  |
| Newark Firehouse                                                    | SLAMS   | 40.72099 | -74.19289  |
| New Brunswick                                                       | SLAMS   | 40.47283 | -74.42240  |
| Rutgers University                                                  | SLAMS   | 40.46218 | -74.42944  |
| Elizabeth Lab                                                       | SLAMS   | 40.64144 | -74.20837  |
| MORRISANIA                                                          | SLAMS   | 40.83606 | -73.92009  |
| BOTANICAL GARDEN                                                    | SLAMS   | 40.86585 | -73.88083  |
| IS 52                                                               | SLAMS   | 40.81600 | -73.90200  |
| DIVISION STREET                                                     | SLAMS   | 40.71436 | -73.99518  |
| QUEENS COLLEGE 2                                                    | SLAMS   | 40.73614 | -73.82153  |
| SD School for the Deaf                                              | SLAMS   | 43.54792 | -96.70077  |
| Fresno – Garland                                                    | EPA CSN | 36.78538 | -119.77321 |
| DUDLEY SQUARE ROXBURY                                               | EPA CSN | 42.32950 | -71.08260  |

|                  |         |          |           |
|------------------|---------|----------|-----------|
| IS 52            | EPA CSN | 4081600  | -73.90200 |
| DIVISION STREET  | EPA CSN | 40.71436 | -73.9518  |
| QUEENS COLLEGE 2 | EPA CSN | 40.73614 | -73.82153 |

**Table S2.** Annual changes in aerosol optical depth (AOD) and surface mass concentrations of PM<sub>2.5</sub> and several chemical constituents at sites in the eastern and western U.S. from 2006 to 2015. Statistically significant linear regression coefficients ( $p < 0.05$ ) are denoted with asterisks.

| Region | Parameter         | Rate of Change                     |
|--------|-------------------|------------------------------------|
| East   | AOD               | $-6.70 \times 10^{-3} (yr^{-1})^*$ |
|        | PM <sub>2.5</sub> | $-0.38 (\mu g m^{-3} yr^{-1})^*$   |
|        | Nitrate           | $-0.06 (\mu g m^{-3} yr^{-1})^*$   |
|        | Sulfate           | $-0.23 (\mu g m^{-3} yr^{-1})^*$   |
|        | ALW               | $-0.40 (\mu g m^{-3} yr^{-1})^*$   |
| East   | AOD               | $-3.50 \times 10^{-3} (yr^{-1})$   |
|        | PM <sub>2.5</sub> | $-0.13 (\mu g m^{-3} yr^{-1})$     |
|        | Nitrate           | $-0.06 (\mu g m^{-3} yr^{-1})^*$   |
|        | Sulfate           | $-0.01 (\mu g m^{-3} yr^{-1})$     |
|        | ALW               | $-0.03 (\mu g m^{-3} yr^{-1})$     |

**Table S3.** Standard CMAQ performance metrics for all observation stations. The abbreviations used in this table are as follows: STDEV – standard deviation, NMB –

normalizes mean bias, MB – mean bias, and RMSE – root mean square error. The MB, NMB, and RMSE are calculated based on Equation 2, 3, and 4 in Appel et al. 2021\*, respectively. Statistically insignificant linear regression coefficients ( $p > 0.05$ ) are colored in red.

| <b>Year</b> | <b>Month</b> | <b>#Stations</b> | <b>Obs<br/>mean</b> | <b>Model<br/>mean</b> | <b>STDEV<br/>obs</b> | <b>STDEV<br/>model</b> | <b>NMB</b> | <b>MB</b> | <b>RMSE</b> | <b>r</b> |
|-------------|--------------|------------------|---------------------|-----------------------|----------------------|------------------------|------------|-----------|-------------|----------|
| 2005        | August       | 12               | 38.68               | 64.78                 | 11.06                | 19.03                  | 26.10      | 67.47     | 32.60       | 0.16     |
| 2006        | January      | 12               | 129.51              | 123.25                | 57.60                | 55.72                  | -6.36      | -4.83     | 44.71       | 0.67     |
| 2015        | August       | 25               | 62.45               | 52.28                 | 19.99                | 13.00                  | -10.17     | -16.29    | 20.61       | 0.45     |
| 2016        | January      | 20               | 132.03              | 92.92                 | 67.18                | 41.55                  | -39.11     | -29.62    | 68.07       | 0.53     |

\*Appel, K. W., Bash, J. O., Fahey, K. M., Foley, K. M., Gilliam, R. C., Hogrefe, C., Hutzell, W. T., Kang, D., Mathur, R., Murphy, B. N., Napelenok, S. L., Nolte, C. G., Pleim, J. E., Pouliot, G. A., Pye, H. O. T., Ran, L., Roselle, S. J., Sarwar, G., Schwede, D. B., Sidi, F. I., Spero, T. L., and Wong, D. C.: The Community Multiscale Air Quality (CMAQ) model versions 5.3 and 5.3.1: system updates and evaluation, *Geosci. Model Dev.*, 14, 2867–2897, <https://doi.org/10.5194/gmd-14-2867-2021>, 2021.
